# Supplementary material
Source: publisher figshare collection journal article supplement (https://diabetesjournals.figshare.com/ndownloader/files/28057455)
Supplement: Supplementary file 1 [file 28057455]

## Sheet: TRBV
Table S2: TRBV-usage in TCRs expressed by Treg newly developing in the NOD and B6 thymus
TRBV	B6 Replicate 1 (%)	B6 Replicate 2 (%)	B6 Replicate 3 (%)	NOD Replicate 1 (%)	NOD Replicate 2 (%)	NOD Replicate 3 (%)	mean B6	s.d. B6	mean NOD	s.d. NOD	Log2(FC NOD/B6)	pValue
TRBV1	3.9125	4.2584	4.3468	4.9044	4.8522	6.0833	4.1726	0.2295	5.28	0.6962	0.2799	0.0404
TRBV2	2.2458	2.0962	1.5799	2.6099	2.0239	2.2915	1.974	0.3494	2.3084	0.2934	0.1537	0.1914
TRBV3	7.2948	7.706	5.8545	4.5985	4.8184	4.3775	6.9518	0.9722	4.5981	0.2205	-0.5063	0.0404
TRBV4	3.1225	2.7027	3.9217	3.5277	3.4127	3.2934	3.249	0.6193	3.4113	0.1172	0.0541	0.3313
TRBV5	8.7992	9.031	7.0334	7.5813	11.9739	13.0042	8.2879	1.0926	10.8531	2.8799	0.3518	0.1914
TRBV8	0	0	0	0.0096	0	0.0051	0	0	0.0049	0.0048	0.0071	0.0984
TRBV9	0.0162	0.0066	0.016	0.0287	0.0085	0.0051	0.0129	0.0055	0.0141	0.0128	0.0017	0.5
TRBV14	0.7522	1.002	1.0987	1.8642	1.3126	1.3205	0.951	0.1788	1.4991	0.3162	0.3572	0.0404
TRBV15	6.8781	6.5326	8.4048	6.8642	6.3511	5.7442	7.2718	0.9963	6.3198	0.5607	-0.1764	0.0952
TRBV16	4.6702	5.3197	3.7132	4.1396	4.2002	6.0217	4.5677	0.8081	4.7872	1.0696	0.0558	0.5
TRBV17	1.8183	1.9051	2.7909	3.4417	2.8029	2.4097	2.1714	0.5382	2.8848	0.5208	0.2927	0.0952
TRBV19	3.5824	2.7291	3.9297	5.4111	4.0647	3.1187	3.4137	0.6178	4.1982	1.152	0.236	0.1914
TRBV20	2.3973	2.2347	4.3307	3.5373	2.7606	2.1579	2.9876	1.166	2.8186	0.6915	-0.0625	0.5
TRBV21	0.0325	0.0461	0.0722	0.1147	0.0677	0.0514	0.0503	0.0202	0.0779	0.0329	0.0374	0.1914
TRBV23	1.959	1.938	3.5528	1.8834	0.9146	1.1715	2.4833	0.9263	1.3232	0.5019	-0.5843	0.0404
TRBV24	0.5141	0.4812	0.8902	0.8604	0.6859	0.4727	0.6285	0.2272	0.673	0.1942	0.0389	0.5
TRBV26	2.814	2.762	2.815	2.4379	1.6428	1.3205	2.797	0.0303	1.8004	0.5751	-0.4392	0.0404
TRBV29	4.1398	3.5003	5.8224	9.2161	7.435	5.4719	4.4875	1.1995	7.3743	1.8728	0.6098	0.0952
TRBV30	0.1569	0.3428	0.4251	0.2486	0.1355	0.2723	0.3083	0.1374	0.2188	0.0731	-0.1022	0.1914
TRBV31	8.2526	7.851	11.0835	11.0229	8.6375	6.8078	9.0624	1.7618	8.8227	2.1136	-0.0348	0.0952
TRBV12-1	9.6217	9.3672	8.2605	4.8088	4.3103	3.2626	9.0831	0.7237	4.1272	0.7892	-0.9757	0.0404
TRBV13-1	8.415	8.5234	6.1994	6.6252	9.7976	12.0742	7.7126	1.3116	9.499	2.7367	0.2691	0.1914
TRBV12-2	4.3942	3.9684	3.0075	2.4474	2.0323	1.8651	3.79	0.7103	2.1149	0.2998	-0.6208	0.0404
TRBV13-2	8.3933	8.7014	5.5658	7.4952	9.4589	12.028	7.5535	1.7283	9.6607	2.2731	0.3177	0.1914
TRBV13-3	5.8174	6.9941	5.2851	4.3212	6.3003	5.3692	6.0322	0.8745	5.3302	0.9901	-0.1517	0.3313

## Sheet: legend
Newly developing CD4(+)CD8(-)GFP(+)Thy1.1(+) Treg were FACS-sorted from thymi of eight-week-old B6 and NOD female Rag-Gfp Foxp3-Thy1a mice, mRNA isolated, TCRb libraries generated and sequenced, and data processed as described in the "Research design and methods" section.
